# Supplementary material for: A climatological benchmark for operational radar rainfall bias reduction
Source: Copernicus journal article supplement (doi:10.5194/hess-25-4061-2021), 2021-07-13
Supplement: Supplementary file 1 [file hess-25-4061-2021-supplement.zip]

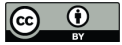

*Supplement of*

## **A climatological benchmark for operational radar rainfall bias reduction**

**Ruben Imhoff et al.**

*Correspondence to:* Ruben Imhoff ([ruben.imhoff@deltares.nl](mailto:ruben.imhoff@deltares.nl))

- [hess-25-4061-2021-supplement-title-page.pdf](#)
- [Daily\\_Clim\\_BiasCorFactors.gif](#)

The copyright of individual parts of the supplement might differ from the article licence.
