# Supplementary material for: A climatological benchmark for operational radar rainfall bias reduction
Source: Copernicus journal article supplement (doi:10.5194/hess-25-4061-2021), 2021-07-13
Supplement: Supplementary file 2 [file hess-25-4061-2021-supplement.zip]

Archive with 2 entries (2 files):
- hess-25-4061-2021-supplement-title-page.pdf
- Daily_Clim_BiasCorFactors.gif
