# Supplementary figures and images for: A climatological benchmark for operational radar rainfall bias reduction
Source: Copernicus journal article supplement (doi:10.5194/hess-25-4061-2021), 2021-07-13

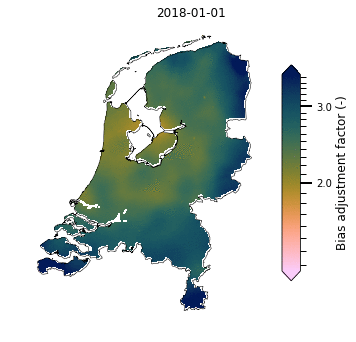

Supplement: Supplementary file 2 [file hess-25-4061-2021-supplement.zip › Daily_Clim_BiasCorFactors.gif]
